# Supplementary material
Source: PubMed Central journal article supplement (PMC2980316)
Supplement: 00180.2010_1.pdf [file 00180.2010_1.pdf]

Supplementary Fig. 1

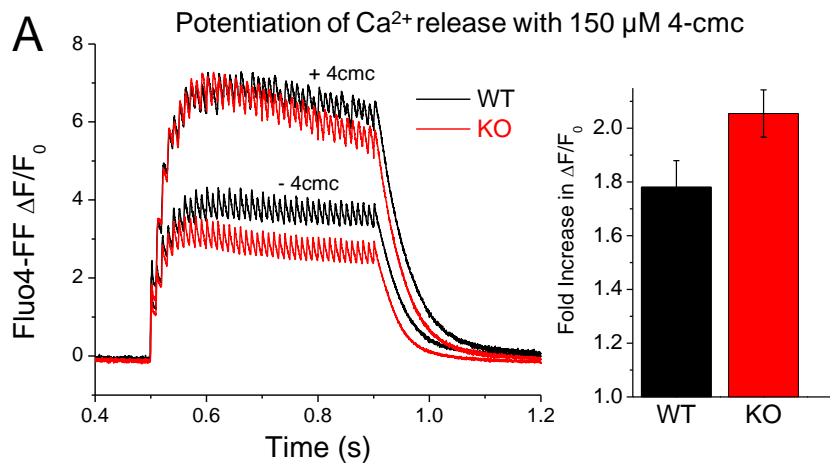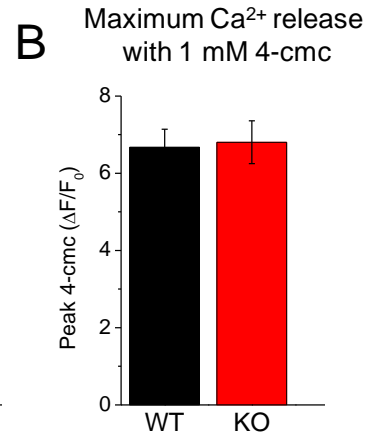

**Supplementary Figure 1: Potentiation of SR Ca<sup>2+</sup> release with 4-CmC.** A, Left- Average Fluo4-FF responses of WT and S100A1 KO fibers to 400ms, 100 Hz train before and after potentiation of Ca<sup>2+</sup> release with low dose (150  $\mu$ M) 4-cmc. Following sensitization of RyR1 with low dose 4-cmc application, KO fibers show a similar peak tetanic Ca<sup>2+</sup> transient amplitude as WT fibers. Right- Fold increase in tetanic Ca<sup>2+</sup> transient amplitude in the presence of 150  $\mu$ M 4-cmc (WT =  $1.78 \pm 0.1$ , n = 7 fibers; KO =  $2.05 \pm 0.09$ , n = 5 fibers; p = 0.1). B, Maximum  $\Delta F/F_0$  Fluo4-FF signal following local application of 1mM 4-CmC on WT and KO fibers. This concentration was found to elicit a maximal response. Both groups demonstrated a similar maximal response to 4-CmC (WT  $6.67 \pm 0.47$ , n = 10; KO  $6.80 \pm 0.55$ , n = 13).
